# Supplementary material
Source: Springer Nature journal article supplement (https://www.springermedizin.de/resource/supplementary/12885_2013_4475_MOESM3_ESM.pdf/9466514)
Supplement: MOESM3 [file 9466514]

**Table S2.** Univariate and multivariate analyses of prognostic factors

|                                          | TTR            |                     |                | OS             |                    |                |
|------------------------------------------|----------------|---------------------|----------------|----------------|--------------------|----------------|
|                                          | Univariate     | Multivariate        |                | Univariate     | Multivariate       |                |
|                                          | <i>P</i> value | H.R. (95% CI)       | <i>P</i> value | <i>P</i> value | H.R. (95% CI)      | <i>P</i> value |
| Age, year ( $\leq 52$ vs $>52$ )         | 0.173          | NA                  | NA             | 0.787          | NA                 | NA             |
| Gender (female vs male)                  | 0.616          | NA                  | NA             | 0.654          | NA                 | NA             |
| HBV infection (no vs yes)                | 0.903          | NA                  | NA             | 0.168          | NA                 | NA             |
| Liver cirrhosis (no vs yes)              | 0.803          | NA                  | NA             | 0.225          | NA                 | NA             |
| ALT, U/L ( $\leq 75$ vs $>75$ )          | 0.177          | NA                  | NA             | 0.225          | NA                 | NA             |
| $\gamma$ -GT, U/L ( $\leq 54$ vs $>54$ ) | <0.001         |                     | 0.008          | <0.001         |                    | 0.046          |
| AFP, ng/ml ( $\leq 20$ vs $>20$ )        | 0.004          |                     | 0.023          | 0.014          |                    | 0.098          |
| Tumor size, cm ( $\leq 5$ vs $>5$ )      | <0.001         |                     | <0.001         | <0.001         |                    | <0.001         |
| Tumor number (single vs multiple)        | 0.057          | NA                  | NA             | 0.069          | NA                 | NA             |
| Tumor capsule (yes vs no)                | 0.096          | NA                  | NA             | 0.167          | NA                 | NA             |
| Differentiation (well vs poor)           | 0.162          | NA                  | NA             | 0.124          | NA                 | NA             |
| Tumor thrombi (no vs yes)                | 0.001          |                     | 0.021          | <0.001         | NA                 | 0.009          |
| TNM stage (I vs II/III)                  | <0.001         | NA                  | NA             | <0.001         | NA                 | NA             |
| BCLC stage (AvsB/C)                      | 0.001          | NA                  | NA             | <0.001         | NA                 | NA             |
| Mean Density Score (low vs high)         |                |                     |                |                |                    |                |
| iSirt1 (2)                               | 0.928          |                     | NA             | 0.217          |                    | NA             |
| pSirt1 (3)                               | 0.129          |                     | NA             | 0.064          |                    | NA             |
| iSirt2 (2)                               | 0.074          |                     | NA             | 0.008          |                    | 0.265          |
| pSirt2 (4)                               | 0.408          |                     | NA             | 0.076          |                    | NA             |
| iSirt4 (2)                               | 0.052          |                     | NA             | 0.004          | 0.683(0.470-0.991) | 0.042          |
| pSirt4 (4)                               | 0.019          | 0.708 (0.500-1.001) | 0.047          | 0.075          |                    | NA             |
| iSirt5 (3)                               | 0.035          |                     | 0.310          | 0.001          | 0.561(0.362-0.867) | 0.006          |
| pSirt5 (4)                               | 0.130          |                     | NA             | 0.157          |                    | NA             |
| iSirt6 (0)                               | 0.310          |                     | NA             | 0.253          |                    | NA             |
| pSirt6 (3)                               | 0.016          |                     | 0.050          | 0.017          |                    | 0.081          |
| iSirt7 (6)                               | 0.319          |                     | NA             | 0.257          |                    | NA             |
| pSirt7 (4)                               | 0.120          |                     | NA             | 0.043          | 0.515(0.251-1.057) | 0.039          |

Note: Univariate analysis was calculated by the Kaplan–Meier method (the log-rank test). Multivariate analysis was done using the Cox multivariate proportional hazards regression model in a stepwise manner (forward, likelihood ratio). AFP, a-fetoprotein; 95% CI, 95% confidence interval;  $\gamma$ -GT,  $\gamma$ -glutamyl transferase; HR, hazard ratio; NA, not applicable; OS, overall survival; TTR, time to recurrence.
